# Supplementary material for: The Cardioprotective Effects of Semaglutide Exceed Those of Dietary Weight Loss in Mice With HFpEF
Source: PubMed Central journal article supplement (PMC10714176; doi:10.1016/j.jacbts.2023.05.012), 2023-07-26
Supplement: mmc1.pdf [file mmc1.pdf]

## SUPPLEMENTAL MATERIAL

The cardioprotective effects of semaglutide exceed those of dietary weight loss in mice with HFpEF

Authors:

Coenraad Withaar Msc<sup>2\*</sup>, Laura M.G. Meems PhD MD<sup>2\*</sup>, Edgar E. Nollet MSc<sup>3,4</sup>, E. Marloes Schouten<sup>2</sup>, Marie A. Schroeder PhD<sup>6</sup>, Lotte B. Knudsen PhD<sup>6</sup>, Kristoffer Niss PhD<sup>6</sup>, Christian T. Madsen PhD<sup>6</sup>, Annabelle Hoegl PhD<sup>6</sup>, Gianluca Mazzoni PhD<sup>6</sup>, Jolanda van der Velden PhD<sup>3,4</sup>, Carolyn S.P. Lam PhD MD<sup>2,5</sup>, Herman H.W. Silljé PhD<sup>2</sup>, Rudolf A. de Boer, PhD MD<sup>1,2</sup>

<sup>1</sup> Erasmus MC, department of Cardiology, Dr. Molewaterplein 40, 3015GD, Rotterdam, the Netherlands

<sup>2</sup> University of Groningen, University Medical Center Groningen, Department of Cardiology, The Netherlands, Hanzeplein 1, 9713 GZ, Groningen, the Netherlands

<sup>3</sup> Amsterdam UMC location Vrije Universiteit Amsterdam, Physiology, De Boelelaan 1117, Amsterdam, the Netherlands

<sup>4</sup> Amsterdam Cardiovascular Sciences, Heart failure & arrhythmias, Amsterdam, The Netherlands

<sup>5</sup> National Heart Centre, Singapore, and Duke-National University of Singapore

<sup>6</sup> Research and Early Development, Novo Nordisk A/S, Denmark

\* equal contribution

## Supplementary Data

### 1. Extended methods

#### 1.1 Animals

All animal studies were approved by the Central Committee of Animal experiments (CCD) license number AVD105002016487 and the Animal Care and User Committee of the Groningen University (permit number 16487-07-04) and conducted in accordance with the ARRIVE guidelines<sup>30</sup>, the general principles governing the use of animals in experiments of the European Communities (Directive 2010/63/EU) and Dutch legislation (The revised Experiments on Animals Act, 2014). Female, 18-22 months old C57BL6/J mice were purchased from Jackson laboratory. Mice were housed on a 12h light/12h dark cycle with *ad libitum* access to chow and water. Echocardiography, mini pump placement, and sacrifice were performed under anesthesia with oxygen and 2-3% isoflurane, as published before<sup>29</sup>. Animals were euthanized by dissecting the diaphragm under isoflurane anesthesia, after which organs were harvested.

#### 1.2 Experimental design

We have shown previously that a murine model of HFpEF has several similarities with human HFpEF.<sup>28,29</sup> Briefly, aged female mice were fed a high fat diet (HFD; 60% kcal fat, 20% kcal protein, 20% kcal carbohydrates; Research Diets D17041409), or a low-fat equivalent chow (CTRL, n = 10; 20% kcal fat, 20% kcal protein, 60% kcal carbohydrates; Research diets D17041407) for 12 consecutive weeks. After 8 weeks of HFD, mice underwent surgery and an ALZET<sup>®</sup> osmotic mini pump (Model 2004) with Angiotensin-II (ANGII) (1,25 mg/kg/day) was implanted in a subcutaneous pocket on the back. For CTRL mice, the subcutaneous pocket was closed without placement of a pump.

After pump implantation, mice on HFD were assigned to a group with subcutaneous (s.c.) semaglutide treatment (Sema, n = 12) or Vehicle treatment, PBS (Veh, n = 16) during last four weeks of this study. Semaglutide was uptitrated over 5 days to a final dose of 9 nmol/kg/day and this final dose was continued during 23 days. To determine the extent to which the cardiometabolic effects of semaglutide occurred by changes in body weight or body composition caused by reduced food intake we designated a separate group of mice, after 8 weeks and pump implantation, to pair feeding (PF, n = 8) using a pair-feeding protocol. With this technique the amount of food consumed by the semaglutide groups is matched to that consumed by the pair-fed group on daily base. A schematic overview of the experimental design is displayed in figure 1A.

#### 1.3 Echocardiography

Three days prior to sacrifice, 2D transthoracic echocardiographic measurements were performed using a Vevo 3100 system equipped with a 40-MHz MXX550D linear array transducer (FUJIFILM VisualSonics). Prior to echocardiographic imaging, mice were anesthetized (2% isoflurane (TEVA Pharmachemie) mixed with oxygen, administered via an aerial dispenser) and the hair was removed from the thorax using a commercially available topical depilation agent with potassium thioglycolate (Veet). Mice were fixed in supine position on the (37°C) temperature-maintained platform of the Vevo imaging station (FUJIFILM VisualSonics) over the integrated electrode pads to monitor the heart and respiration rates. Parasternal short and long axis views were obtained at Left Ventricular (LV) mid-papillary level. Vevo LAB software (version 5.5.1) was used to assess cardiac dimensional and functional parameters and offline speckle tracking analysis (VEVO strain) was used to determine myocardial performance as previously described.<sup>29,31,78</sup> Parasternal long axis Bmode recordings were

used for speckle-tracking analysis to evaluate global longitudinal strain (GLS) and reverse peak longitudinal strain (RPLSR) by outlining the epicardial and endocardial borders. Short axis M-mode recordings were used to determine heart rate, LV end-diastolic internal diameter (LVIDd), LV end-systolic internal diameter (LVIDs), left ventricle anterior wall thickness (LVAW), left ventricle posterior wall thickness (LVPW) and fractional shortening (FS) by outlining the epicardial and endocardial borders using the LV Trace tool. For two-dimensional (2D) measurements, three subsequent cardiac cycles, unaffected by respiration, were analyzed. A blinded observer performed all measurements.

#### **1.4 Histological analysis**

LV mid-transverse sections were fixed in 4% paraformaldehyde before paraffin embedding, as described previously<sup>79</sup> and cut into 4 $\mu$ m thick sections. Masson's trichrome stain (Masson) was performed to detect collagen deposition as a measurement of fibrosis as previously described.<sup>32</sup> Cardiomyocyte cross sectional area (CSA) ( $\mu$ m<sup>2</sup>) was visualized with immunofluorescent staining with germ agglutinin fluorescein isothiocyanate (WGA-FITC) (Sigma-Aldrich) as previously reported.<sup>29</sup> For cardiomyocyte size quantification, five randomly selected fields from WGA-FITC LV sections imaged at 20X magnification were used to measure cross-sectional diameter from approximately 50 cells per mouse and calculated as average cross sectional area (CSA).

#### **1.5 Passive force measurements**

Individual cardiomyocytes were isolated mechanically from frozen cardiac tissue and myofilament function measurements were executed as previously described.<sup>33</sup> Briefly, frozen tissues were thawed and mechanically disrupted in relax solution containing 1 mM Mg<sup>2+</sup>, 145 mM KCl, 2 mM EGTA, 4 mM ATP, 10 mM imidazole (pH 7.0). Membranes were permeabilized with 0.5% Triton-X-100, after which individual cells were mounted to a motor needle and a force transducer needle. Passive stiffness was evaluated by increasing sarcomere length of cardiomyocytes from 1.8  $\mu$ m to 2.4  $\mu$ m in 0.2  $\mu$ m steps. Maximal force generation was measured by transferring cardiomyocytes to activating solution with a pCa of 4.5.

#### **1.6 Visceral adipose tissue (VAT) RNA sequencing**

RNA was extracted from pulverized VAT tissue using Lysing matrix D beads (MP Biomedicals) and standard TRIzol extraction (Thermo Fisher Scientific). RNA quality was determined using RNA Pico Chips on Bioanalyzer 2100 (Agilent) and TruSeq stranded mRNA libraries (Illumina) were generated from high quality total RNA (RNA integrity number > 7.5). Samples were subjected to paired end sequencing with NovaSeq 6000 (illumine HiSeq). Reads were aligned to mouse reference genome (GRCm38 - mm10) using STAR 2.7.3a and read quantification was performed using Salmon 1.2.0. using Ensembl gene annotation GRCm38.101. Principle component analyses (PCA) and Differential Expression (DE) analysis were performed using DESeq2 1.26.0. Only protein coding genes with at least 1 CPM were used in the analysis (18637 genes). Gene functional enrichment was performed using Gprofiler 2.0.2.0 (e106\_eg53\_p16\_65fcd97, database updated on 18/05/2022) separately for up-regulated and down-regulated sets of genes. Revigo was used to reduce redundant pathways and only unique pathways for Sema or PF were showed. RNA-Seq data have been deposited in NCBI Gene Expression Omnibus and are accessible through GEO Series upon request.

#### **1.7 Left Ventricle single nuclei RNA sequencing**

##### **1.7.1 Single nuclei isolation**

Single-nuclei suspensions were obtained from snap frozen cryo-grinded tissue by further homogenization and cellular membrane lysis by the use of lysis buffer (Nuclei Extraction Buffer,

Miltenyi biotec\* + 0.2 U/μl RNase Inhibitor Roche) in combination with the gentleMACS™ Octo Dissociator with Heaters (Miltenyi biotec). For single nuclei isolation each group consist of n = 3 pooled samples (pooled 3 animals). Homogenate was then filtered through MACS® SmartStrainers 30 μm (Miltenyi biotec) and pluriStrainer®Mini 10 μm (pluriSelect Life Science) and followed by centrifugation (300 x g, 10 min, 4°C). Supernatant was removed and pellet was resuspended in Resuspension Buffer (DPBS -Ca<sup>2+</sup>, -Mg<sup>2+</sup>, Sigma-Aldric + 0.4% BSA, Sigma-Aldrich + 0.2 U/μl RNase Inhibitor, Roche). A debris removal step was added using Debris Removal Solution (Miltenyi biotec) following supplier's protocol. After a final centrifugation step the pellet was resuspended in resuspension buffer and nuclei were counted on NucleoCounter NC-200 (ChemoMetec, average of two counts performed) and visually inspected under microscope. No FACS sorting was performed for the single-nuclei suspensions to be as un-biased as possible in regard to cell populations.

### **1.7.2 cDNA Library preparation**

Isolated nuclei were loaded into the Chromium Controller (Model GCG-SR-1, 10X Genomics) with a Targeted Cell Recovery set to 5000 cells per sample. cDNA Libraries were generated according to supplier's instructions (10X Genomics) with a few modifications using the Chromium Next GEM Single Cell 3'GEM, Library & Gel Kit, v3.1 (10X Genomics) with a Single Index T Set A kit (10X Genomics) and steps performed on the C1000 Touch™ Thermal Cycler with a 96-Deep Well Reaction Module (Bio-Rad)

### **1.7.3 Single-nuclei RNA sequencing**

cDNA libraries were combined two and two (2nM each cDNA Library) and sequenced on the NextSeq500/550 Illumina Platform using NextSeq 500/550 High Output Kit v2.5 (75 Cycles, Illumina). A Phix control (Illumina) was included in a final concentration of 1%.

### **1.7.4 Sample Processing and Quality Control**

Samples representing different groups were processed together in series of either 2 or 4 samples from single-nuclei suspensions to construction of cDNA library. Samples were loaded in random order on the Chip G, across the lanes of the chip, thereby preventing any possible technical bias of the groups. Samples quality checked on Qubit 4 Fluorometer (Invitrogen) using the Qubit™ 1X dsDNA HS Assay Kit (Invitrogen) and on the 2100 Bioanalyzer (Agilent) using the Agilent High Sensitivity DNA Kit. Sequencing quality was verified by the Q30 value after each run (Q30 all in the range 90.8-95.3%).

### **1.7.5 Genome alignment, gene expression quantification, doublet scoring and ambient mRNA cleaning**

Samples were processed into count matrices with Cell Ranger from 10x Genomics (mkfastq v4.0 and count v6.0.1) using default values and setting include introns to True. As reference genome, we used the mouse reference mm10 (GENCODE vM23/Ensembl 98) provided by 10x Genomics for Cell Ranger (<https://support.10xgenomics.com/single-cell-gene-expression/software/release-notes/build>). Each cell was assigned a doublet score using Scrublet (v0.2.3) (expected doublet rate 0.06, min counts 2, min cells 3, min gene variability pct 85) on the filtered count matrices. The R package SoupX with default parameters was used to adjust for ambient mRNA, being provided the filtered and unfiltered count matrices and the graph-based clustering produced by Cell Ranger.

(using hearth and aorta scRNA-Seq data from Tabula Muris)

### **1.7.6 UMAP construction and cell clustering**

SoupX-cleaned count matrices were further processed using the SCTransform-based workflow of Seurat (v4.1). Cells were filtered by  $nFeature\_RNA > 250$ ,  $nFeature\_RNA < 9000$ ,  $percent.mt < 5$ ,  $percent.ribo < 5$  and scrublet score  $< 0.2$ . For the SCTransform function, the variables  $nCount\_RNA$ ,  $orig.ident$  (sample origin),  $percent.mt$  and  $percent.ribo$  were regressed. 20 PCA dimensions were used for both FindClusters and RunUMAP, while a clustering resolution of 0.5 was used for FindClusters. For further down-stream analysis, the RNA assay was used and normalized using NormalizeData.

### **1.7.7 Cell type identification**

Manual cell type annotation of clusters was based on both human and mouse gene markers from.<sup>83–85</sup> The manual annotation was supplemented with automatic cell type annotation using SCINA (using heart and aorta scRNA-Seq data from Tabula Muris) with default parameters and a reference list of markers. In addition, we used scClassify with default parameters based on the heart and aorta dataset from tabula muris.<sup>86</sup>

### **1.7.8 Differential expression and gene ontology analysis**

For the in-depth analysis of the ventricular and endothelial cells, we used  $return.thresh\ 0.05$ ,  $logfc.threshold\ 0.25$ ,  $min.pct\ 0.25$ ,  $min.diff.pct\ 0.10$  and finally filtering for adjusted p value  $< 0.05$ . Gene functional enrichment was performed using Gprofiler (e106\_eg53\_p16\_65fcd97, database updated on 18/05/2022) separately for up-regulated and down-regulated sets of genes. Revigo was used to reduce redundant pathways and only unique pathways for Sema or PF were shown with focus on biological process gene ontologies, with significant  $g:SCS\ Threshold\ p < 0.05$ .

## **1.8 Proteomics**

### **1.8.1 Left ventricle tissue processing**

Total protein was isolated from frozen left ventricular tissues by adding 8  $\mu$ L ice-cold buffer; 2% sodium deoxycholate (SDC), 5 mM tris (2-carboxyethyl)phosphine (TCEP), 10 mM chloroacetamide (CAA), 5 mM EDTA, 10 mM KCl, 100 mM triethylammonium bicarbonate (TEAB), pH 8.5 per mg of tissue. The samples were homogenized using the TissueLyzer II (Qiagen, Hilden, Germany) at 30 Hz using 3 mm zirconium beads (OPS Diagnostics). After homogenization samples were sonicated at 4°C using a cuphorn (Qsonica) using 3x 4 second on-time (75 amplitude) with a pulse-off time of 10 seconds. Samples were incubated at 95°C at 650 rpm, and then centrifuged at 15,000 g for 20 min at 4°C. Protein concentration was determined using a Nano-drop (Thermo Scientific) at 280 nm. Protein (500  $\mu$ g pr. sample) was digested overnight at 37°C using a Trypsin / Lys-C mix (Promega) at 1:200 (w/w) dilution. Digestion was quenched by adding equal volume of 0.1% formic acid, 1% trifluoroacetic acid (TFA), and centrifuged at 14,000 g for 10 min. The supernatant was carefully transferred to a new tube without disturbing the SDC precipitate, and the digest cleaned on a prewashed C18 SepPak (Waters, USA). Peptides were eluted using 400  $\mu$ L 40% acetonitrile (ACN) and 400  $\mu$ L 60% ACN, subsequently dried in a SpeedVac centrifuge and reconstituted in 65  $\mu$ L 5 mM ammonium bicarbonate.

### **1.8.2 Plasma sample processing**

For library generation, two protein depletion kits (Pierce Top 14 abundant protein immunodepletion kit A3637 and BioRad Proteominer kit 1633006) were used separately and the results were combined to establish a spectral library. For sample preparation, 10  $\mu$ L of plasma was depleted using Pierce Top 12 abundant protein immunodepletion kits (85165). All kits were used according to the manufacturer protocol. Upon Proteominer use, proteins were precipitated using Trichloroacetic acid (TCA) at 20% final concentration and washed with cold acetone to remove detergents and highly concentrated

denaturants from the buffer prior to reduction, alkylation, and digestion. Proteins were reduced and alkylated in Phosphate-buffered saline (PBS) containing 1% SDC, 10 mM TEAB pH 8.5, 5 mM TCEP and 10 mM CAA by heating for 10 min at 90°C. After cooling down to room temperature, the proteases trypsin (Sigma Aldrich) and LysC (Wako) were each added in an enzyme:protein ratio of 1:100 (w/w) and digestion was performed at 37°C for 16 h. The reaction was quenched by acidification to a final concentration of 0.1% TFA and precipitated SDC was removed by centrifugation. Peptides were purified on a SepPak C18 column (Waters, USA) and were eluted in two steps (40% ACN followed by 60% ACN in ddH<sub>2</sub>O).

### **1.8.3 Left ventricle High-pH offline fractionation for data dependent acquisition spectral library generation**

3 µg peptide from each left ventricle sample was pooled (72 µg total) and fractionated by reverse-phase high pressure liquid chromatography on a Dionex UltiMate 3000 HPLC system (Thermo Scientific, USA). Peptides were separated on a Waters CSH C18 analytical column (1 mm x 150 mm, 130Å, 1.7 µm) in a gradient mix of Buffer A (5 mM ammoniumbicarbonate) and Buffer B (90% ACN, 5 mM ammoniumbicarbonate). The flow rate was 30 µL/min and fractions were collected by 3 min to 11.4 min with 252s/fraction; from 11.4 min to 42 min with 122.4s/fraction; and from 42 min to 46 min with 80s/fraction. Peptides were subsequently concatenated into 20 fractions. All fractions were dried and resuspended in 5% formic acid, 3% ACN. For the plasma library 40 µg of peptides were fractionated by high-pH reverse-phase fractionation as above and collected into 20 fractions without concatenation.

### **1.8.4 Left ventricle liquid chromatography and mass spectrometry**

Peptide were separated by a linear ACN gradient for 60 min in a 15-cm fused-silica emitter packed with reversed-phase ReproSil-Pur C18-AQ 1.9 µm resin (Dr. Maisch GmbH) using a nanoflow Easy-nLC 1200 ultra-high pressure system (Thermo Fisher Scientific). The LC was connected through a nano-electrospray ion source to the mass spectrometer. We used a QExactive HF orbitrap instrument with a scan range between 300 to 1600 m/z, 60,000 resolution and a top12 higher-energy collisional dissociation (HCD) fragmentation method for the data-dependent library experiment. Resolution for HCD spectra was set to 30,000 at m/z 200 and an IT of 45 ms. Normalized collision energy (NCE) was set at 28. Precursor ions with single, unassigned, or six and higher charge states were excluded from fragmentation selection. For individual samples we employed a data-independent (DIA) setup with full MS resolutions set to 60,000 at m/z 200 and full MS AGC target was 3E6 with an injection time of 45 ms. Scan range was set to 350–1400 m/z. AGC-target value for fragment spectra was set at 3E6. We used a variable window size with an overlap of 1 Da. Resolution was set to 30,000 and IT to 50 ms. Normalized CE was set at 25 eV. All data were acquired in profile mode using positive polarity with dynamic exclusion set to 30 s to avoid repeated sequencing of the same peptide.

### **1.8.5 Proteomics data analysis**

The data was searched using the Pulsar search engine (Spectronaut version 15.1.210713.50606, Biognosys). The data-dependent and data-independent raw files were used to generate a hybrid library using BSG factory settings. Peptides were searched against the *Mus musculus* Swissprot reference database (downloaded 2017). Search criteria included cysteine carbamidomethylation as a fixed modification as well as N-terminal acetylation and methionine oxidation as variable modifications. The false discovery rate was set to 0.01 for both proteins and peptides, as determined by searching a

reverse decoy database. Cleavage specificity was set as C-terminal to arginine and lysine for trypsin/P, with a maximum number of two missed cleavages and a minimum peptide length of seven amino acids during the database search.

The data was further processed using Perseus software, version 1.6.15.0, filtering using minimum four valid values in each condition group. Sema-3 (sample 434) was removed as an outlier. We did a quantile normalization of the data using an R-script, and a two-sample t-test correcting for multiple hypothesis testing for identifying significant regulated proteins. Data are presented as difference of average (>0.5) and the  $-\log_{10}$  Student T test ( $p < 0.05$ ) were used to compare between groups. Enriched protein sets were identified using Gprofiler (e106\_eg53\_p16\_65fcd97, database updated on 18/05/2022) with significant g:SCS Threshold  $p < 0.05$ . Mass spectrometry data have been deposited to the ProteomeXchange Consortium via the PRIDE partner repository with data set identifier PXD034625.

## **Extended data sets**

### **Supplemental figures**

#### **Supplemental Figure 1. Total plasma ketone bodies**

Total ketones bodies measured in the plasma

CTRL, control chow; HFD, high fat diet; ANGII, angiotensin-II; Veh, daily injections with Vehicle; Sema, daily injections with semaglutide; PF, pair feeding. Statistical testing was performed with Kruskal–Wallis test followed by Dunn’s test. \*P < 0.05 is considered significant.

#### **Supplemental Figure 2. Proteomics left ventricle unique pathways for pair feeding**

Curated Gene Ontology (GO) Biological Processes list of protein identified in the left ventricle demonstrating distinctive pathways engaged by PF. Circle size reflects gene ratio which is proportion of differentially expressed genes in a pathway divided by all differentially expressed genes that map to GO term. Color coding reflects P-value after g:SCS Threshold ( $p < 0.05$ ).

#### **Supplemental Figure 3. Cell type identification of snRNA seq**

Manual cell type annotation of clusters was based on both human and mouse gene markers.

#### **Supplemental Figure 4. UMAP per condition**

Uniform manifold approximation and projection (UMAP) plot of processed snRNA-seq data from left ventricle tissue per condition (Ctrl, Vehicle, Sema and PF mice). Coloring indicates manual annotation of cell type clusters generated by unsupervised clustering.

#### **Supplemental Figure 5. Proportion of cells per condition**

Proportion of cells per condition (Ctrl, Vehicle, Sema and PF mice)

#### **Supplemental Figure 6. Proportion of cells from each cell type**

Proportion of cells from each cell type within each condition (Ctrl, Vehicle, Sema and PF mice)

#### **Supplemental Figure 7. The effect of SoupX**

SoupX-cleaned count matrices.

#### **Supplemental Figure 8. Regulated genes in specific endothelial cell types comparing semaglutide treatment against vehicle**

Dot plot showing regulated genes in specific endothelial cell types comparing semaglutide treatment against Vehicle. Dot size represents the absolute log<sub>2</sub> fold change of a gene, while the color indicates positive (POS, orange) or negative (NEG, blue) regulation of a gene.



Supplemental figures and tables

Supplemental Figure 1 – total plasma ketone bodies

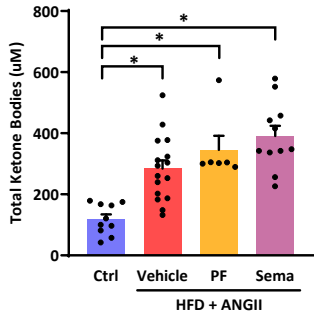

## Supplemental Figure 2 Proteomics left ventricle unique pathways pair feeding

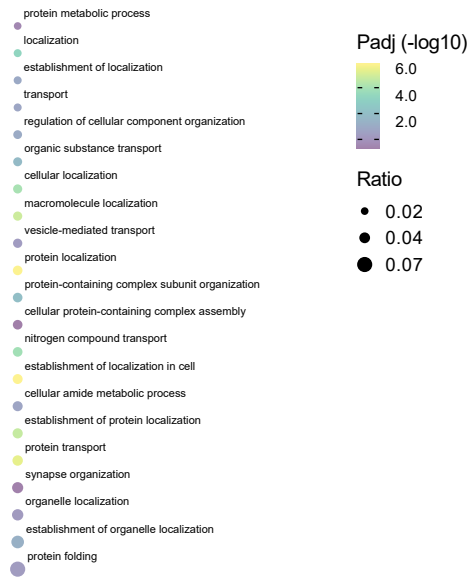

**Figure S3 Cell type identification**

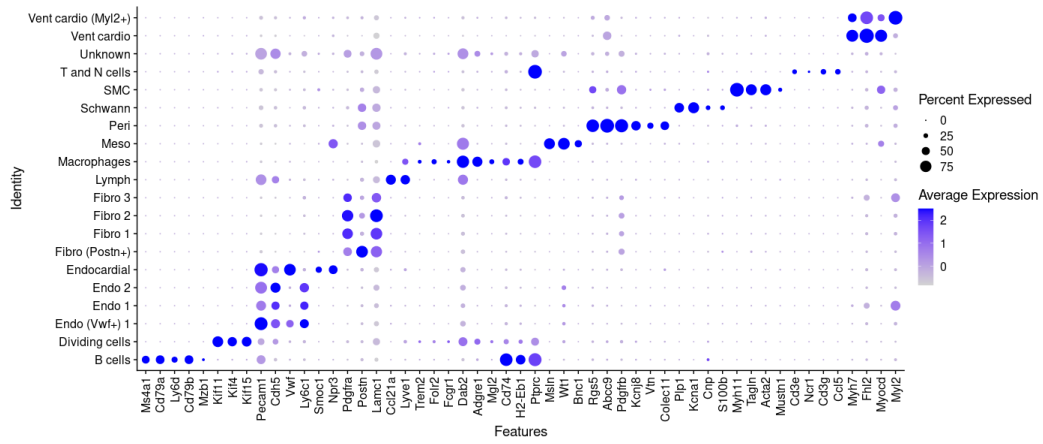

**Figure S4 UMAP per condition**

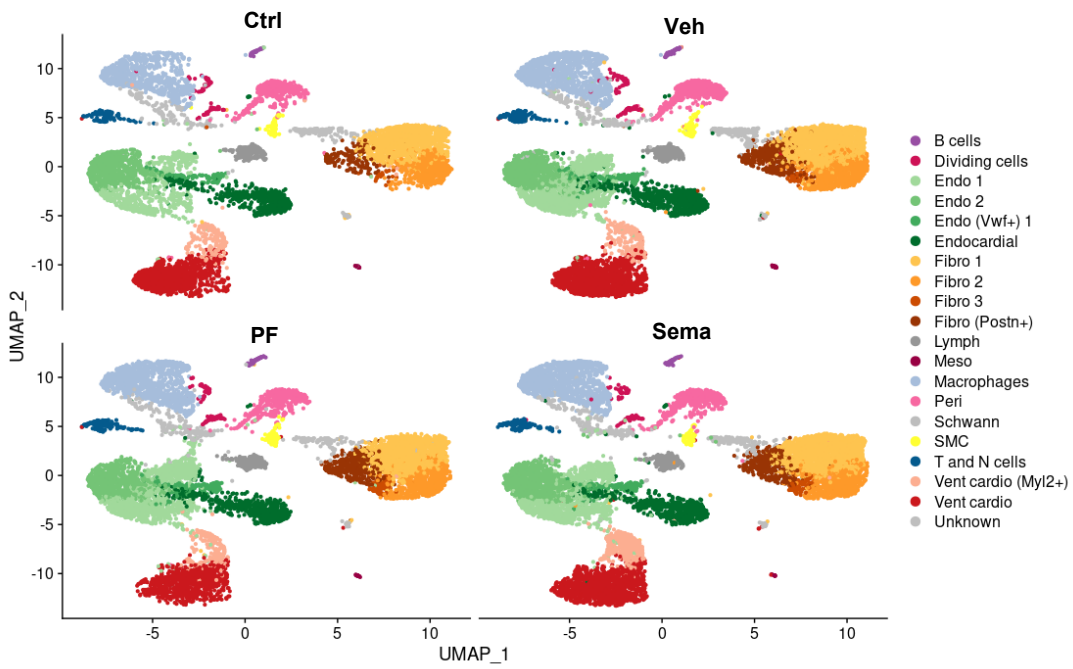

**Figure S5 proportion of cells per condition**

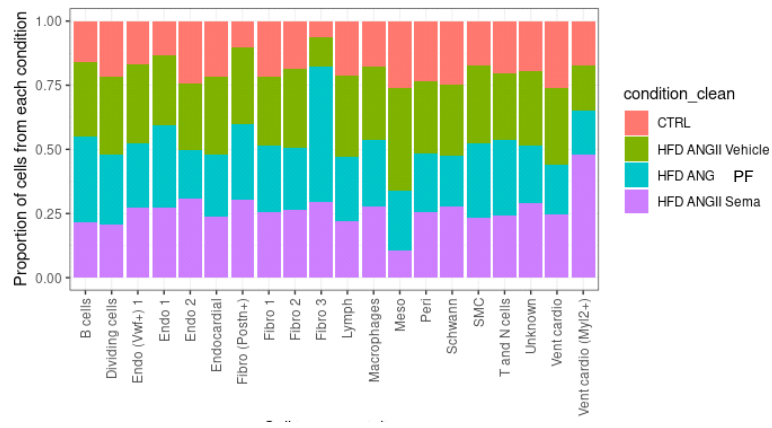

**Figure S6 proportion of cells from each cell type**

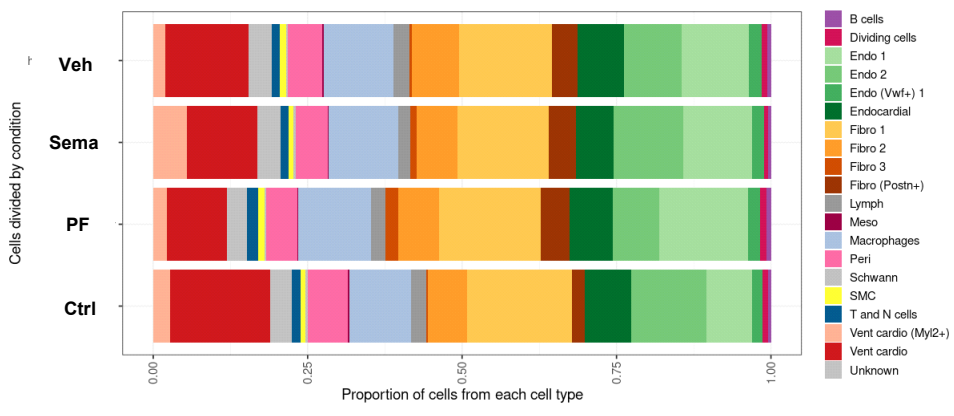

**Figure S7 the effect of SoupX**

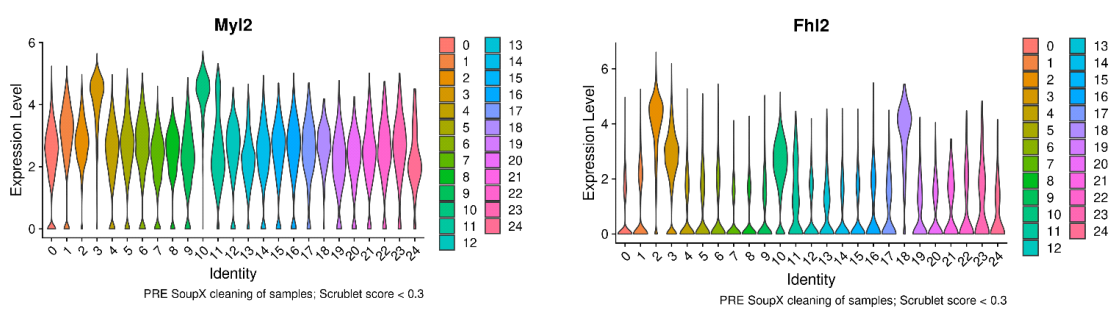



## **Supplemental tables**

### **Supplemental Table 1. Primer sequences used for qPCR.**

### **Supplemental Table 2. Echocardiography parameters.**

LVAW;s, left ventricle anterior wall thickness in systole; LVAW;d, left ventricle anterior wall thickness in diastole LVPW;s, left ventricle posterior wall thickness in systole LVPW;d, left ventricle posterior wall thickness in diastole; GLS, global longitudinal strain; RPLSR, reverse peak longitudinal strain rate.

CTRL, control chow; HFD, high fat diet; ANGII, angiotensin-II; Veh, daily injections with Vehicle; Sema, daily injections with semaglutide; PF, pair feeding. Statistical testing was performed with Kruskal–Wallis test followed by Dunn’s test. \*P < 0.05 is considered significant.

### **Supplemental Table 3. LV RNA expression**

Gene expression was normalized to 36B4 and presented as fold change to CTRL. Data are presented as means ± standard error of the mean. Statistical testing was performed with Kruskal–Wallis test followed by Mann–Whitney U test. \*P < 0.05 compared to CTRL. #P < 0.05 compared to HFD+ANGII Vehicle. ANP, atrial natriuretic peptide; Col1a1, collagen 1a1; Col3a1, collagen 3a1; Gal-3, galectin-3; GDF15, growth derived factor 15; IL-6, interleukin-6; TIMP-1, tissue inhibitor of metalloproteinases 1.

CTRL, control chow; HFD, high fat diet; ANGII, angiotensin-II; Veh, daily injections with Vehicle; Sema, daily injections with semaglutide; PF, pair feeding. Statistical testing was performed with Kruskal–Wallis test followed by Dunn’s test. \*P < 0.05 is considered significant.

### **Supplemental Table 4. Pathways and lead edge genes that are differently regulated with semaglutide or pair feeding treatment in endothelial cells or cardiac cells.**

Gene ontology, biological processes enrichment analysis of up- or downregulated genes in endothelial cells and cardiac cells comparing semaglutide against Vehicle and pair feeding (PF) against Vehicle.

### **Supplemental Table 5. Pathways and lead edge genes that are differently regulated with semaglutide or pair feeding treatment in cardiac cells.**

Gene ontology, biological processes enrichment analysis of up- or downregulated genes in cardiac cells comparing semaglutide against Vehicle and pair feeding (PF) against Vehicle.

### **Supplemental Table 6. Pathways and lead edge proteins that are differently regulated with semaglutide or pair feeding treatment in left ventricle tissue**

Gene ontology, biological processes enrichment analysis of up- or downregulated proteins in left ventricle tissue comparing semaglutide against Vehicle and pair feeding (PF) against Vehicle.

**Supplemental Table 1**

| Gene          | Protein | 5' - 3' forward       | 5' - 3' reverse          |
|---------------|---------|-----------------------|--------------------------|
| <i>Nppa</i>   | ANP     | ATGGGCTCCTTCTCCATCAC  | TCTACCGGCATCTTCTCCTC     |
| <i>TIMP-1</i> | TIMP-1  | CTGCTCAGCAAAGAGCTTTC  | CTCCAGTTTGAAGGGATAG      |
| <i>Col1a1</i> | Col1a1  | CTTACCTACAGCACCTTGTC  | CTTGGTGGTTTTGTATTCGATGAC |
| <i>Col3a1</i> | Col3a1  | GCGATTCAAGGCTGAAG     | GGGTGCGATATCTATGATGG     |
| <i>Il-6</i>   | IL-6    | TCCCAACAGACCTGTCTATAC | CAGAATTGCCATTGCACAACCTC  |
| <i>Gdf-15</i> | GDF-15  | TGACCCAGCTGTCCGATAC   | GTGCACGCGGTAGGCTTC       |
| <i>Rplp0</i>  | 36B4    | AAGCGCGTCTGGCATTGTC   | GCAGCCGCAATGCAGATGG      |

**Supplemental Table 2**

|                         | Ctrl         | HFD+ANGII<br>Veh | HFD+ANGII<br>PF | HFD+ANGII<br>Sema |
|-------------------------|--------------|------------------|-----------------|-------------------|
| <b>Echocardiography</b> | n = 10       | n = 16           | n = 8           | n = 12            |
| Heart Rate              | 440.7 ± 13.6 | 413.1 ± 9.5      | 451.9 ± 20.6    | 479.2 ± 15.9 #    |
| Diameter;s              | 3.0 ± 0.1    | 2.5 ± 0.1 *      | 2.8 ± 0.2       | 2.8 ± 0.1         |
| Diameter;d              | 4.1 ± 0.1    | 3.7 ± 0.1 *      | 4.0 ± 0.1       | 3.9 ± 0.1         |
| Volume;s                | 30.4 ± 4.0   | 23.6 ± 2.5       | 30.4 ± 4.0      | 30.1 ± 2.9        |
| Volume;d                | 76.0 ± 6.5   | 58.5 ± 4.0       | 70.5 ± 5.8      | 65.1 ± 3.6        |
| Stroke Volume           | 39.5 ± 3.0   | 35.0 ± 1.9       | 40.1 ± 2.4      | 35.0 ± 1.7        |
| Ejection Fraction       | 52.7 ± 2.8   | 61.1 ± 2.2       | 57.9 ± 3.0      | 54.5 ± 2.6        |
| Fractional Shortening   | 27.0 ± 1.8   | 32.4 ± 1.6       | 30.3 ± 1.5      | 28.0 ± 1.9        |
| LVAW;s                  | 1.5 ± 0.1    | 1.8 ± 0.0 *      | 1.7 ± 0.0 *     | 1.6 ± 0.1 #       |
| LVAW;d                  | 1.0 ± 0.1    | 1.3 ± 0.0 *      | 1.3 ± 0.0 *     | 1.2 ± 0.1         |
| LVPW;s                  | 1.3 ± 0.1    | 1.8 ± 0.1 *      | 1.7 ± 0.1 *     | 1.5 ± 0.1 #       |
| LVPW;d                  | 1.0 ± 0.0    | 1.3 ± 0.1 *      | 1.3 ± 0.1 *     | 1.1 ± 0.1 #       |
| GLS                     | -19.0 ± 0.8  | -15.9 ± 0.5 *    | -16.8 ± 0.9     | -20.3 ± 1.1 #     |
| RPLSR                   | 10.4 ± 0.8   | 8.3 ± 0.6 *      | 9.0 ± 0.8       | 11.5 ± 1.0 #      |

**Supplemental Table 3**

|                                 | Ctrl    | HFD+ANGII    | HFD+ANGII  | HFD+ANGII    |
|---------------------------------|---------|--------------|------------|--------------|
|                                 |         | Veh          | PF         | Sema         |
| <b>LV RNA expression levels</b> | n = 10  | n = 16       | n = 8      | n = 12       |
| ANP                             | 1 ± 0.2 | 2.05 ± 0.2 * | 2.05 ± 0.2 | 1.33 ± 0.2 # |
| Col1a1                          | 1 ± 0.1 | 2.72 ± 0.4 * | 1.88 ± 0.2 | 1.37 ± 0.2 # |
| Col3a1                          | 1 ± 0.1 | 1.70 ± 0.1 * | 1.68 ± 0.3 | 1.15 ± 0.2 # |
| TIMP-1                          | 1 ± 0.1 | 2.88 ± 0.4 * | 3.50 ± 0.8 | 1.88 ± 0.3 # |
| Gal-3                           | 1 ± 0.1 | 2.07 ± 0.3 * | 1.64 ± 0.2 | 1.03 ± 0.1 # |
| IL-6                            | 1 ± 0.3 | 2.85 ± 0.6 * | 3.54 ± 0.9 | 1.21 ± 0.5 # |
| GDF-15                          | 1 ± 0.1 | 2.73 ± 0.3 * | 1.23 ± 0.2 | 1.39 ± 0.3 # |



## Supplemental Table 4

### Endothelial cell pathways upregulated with sema treatment

| term name                                      | term id    | adjusted p value | negative log10 of adjusted p value | term size | intersection size | ratio | intersections                         |
|------------------------------------------------|------------|------------------|------------------------------------|-----------|-------------------|-------|---------------------------------------|
| calcium ion import into sarcoplasmic reticulum | GO:1990036 | 0.03885753       | 1.41                               | 7         | 2                 | 0.286 | ATP2A2,PLN                            |
| relaxation of cardiac muscle                   | GO:0055119 | 0.00104892       | 2.98                               | 16        | 3                 | 0.188 | TTN,GSN,ATP2A2                        |
| response to muscle stretch                     | GO:0035994 | 0.00287181       | 2.54                               | 23        | 3                 | 0.136 | TTN,GSN,ANKRD1                        |
| ATP synthesis coupled proton transport         | GO:0015986 | 0.00376882       | 2.42                               | 24        | 3                 | 0.125 | ATP5B,ATP5G3,ATP5C1                   |
| energy coupled proton transport                | GO:0015985 | 0.00376882       | 2.42                               | 24        | 3                 | 0.125 | ATP5B,ATP5G3,ATP5C1                   |
| relaxation of muscle                           | GO:0090075 | 9.5001E-05       | 4.02                               | 35        | 4                 | 0.114 | TTN,GSN,ATP2A2,PLN                    |
| cardiac muscle adaptation                      | GO:0014887 | 0.00543451       | 2.26                               | 27        | 3                 | 0.111 | MYH6,NPPB,ATP2A2                      |
| regulation of the force of heart contraction   | GO:0002026 | 0.00677897       | 2.17                               | 29        | 3                 | 0.109 | MYH6,ATP2A2,PLN                       |
| striated muscle adaptation                     | GO:0014888 | 0.00041313       | 3.38                               | 50        | 4                 | 0.080 | GSN,MYH6,NPPB,ATP2A2                  |
| cardiac muscle hypertrophy                     | GO:0003300 | 0.00012308       | 3.91                               | 100       | 5                 | 0.050 | TTN,MYH6,NPPB,SLC25A4,ATP2A2          |
| striated muscle hypertrophy                    | GO:0014897 | 0.00014988       | 3.82                               | 104       | 5                 | 0.048 | TTN,MYH6,NPPB,SLC25A4,ATP2A2          |
| muscle hypertrophy                             | GO:0014896 | 0.00016491       | 3.78                               | 106       | 5                 | 0.047 | TTN,MYH6,NPPB,SLC25A4,ATP2A2          |
| actin-mediated cell contraction                | GO:0070252 | 0.00575533       | 2.24                               | 96        | 4                 | 0.042 | GSN,MYH6,ATP2A2,PLN                   |
| muscle adaptation                              | GO:0043500 | 0.00036142       | 3.44                               | 124       | 5                 | 0.040 | GSN,MYH6,NPPB,SLC25A4,ATP2A2          |
| cardiac muscle contraction                     | GO:0060048 | 0.0004574        | 3.34                               | 130       | 5                 | 0.038 | TTN,GSN,MYH6,ATP2A2,PLN               |
| proton transmembrane transport                 | GO:1902600 | 0.00061563       | 3.21                               | 138       | 5                 | 0.036 | NDUF44,ATP5B,ATP5G3,SLC25A4,ATP5C1    |
| actin filament-based movement                  | GO:0030048 | 0.0159123        | 1.80                               | 124       | 4                 | 0.032 | GSN,MYH6,ATP2A2,PLN                   |
| striated muscle contraction                    | GO:0006941 | 0.00177919       | 2.75                               | 171       | 5                 | 0.029 | TTN,GSN,MYH6,ATP2A2,PLN               |
| purine ribonucleotide biosynthetic process     | GO:0009152 | 0.04667575       | 1.33                               | 163       | 4                 | 0.025 | NPPB,ATP5B,ATP5G3,ATP5C1              |
| ATP metabolic process                          | GO:0046034 | 0.00058471       | 3.23                               | 264       | 6                 | 0.023 | MYH6,MT-ND3,ATP5B,ATP5G3,ATP5C1,HSPA8 |

### Endothelial cell pathways upregulated with PF treatment

| term name                                                               | term id    | adjusted p value | negative log10 of adjusted p value | term size | intersection size | ratio | intersections                                                            |
|-------------------------------------------------------------------------|------------|------------------|------------------------------------|-----------|-------------------|-------|--------------------------------------------------------------------------|
| response to electrical stimulus                                         | GO:0051602 | 0.00012723       | 3.90                               | 49        | 4                 | 0.082 | MT-CO1,BTG2,AKAP12,NRAA1                                                 |
| protein alkylation                                                      | GO:0008213 | 0.04657039       | 1.33                               | 214       | 4                 | 0.019 | MECOM,BTG2,EHMT1,FBXO11                                                  |
| protein methylation                                                     | GO:0006479 | 0.04657039       | 1.33                               | 214       | 4                 | 0.019 | MECOM,BTG2,EHMT1,FBXO11                                                  |
| negative regulation of RNA metabolic process                            | GO:0051253 | 0.00262833       | 2.58                               | 1489      | 9                 | 0.006 | MECOM,ZFP608,BTG2,VGLL4,EHMT1,TLE4,TRPS1,JUN,STAT3                       |
| negative regulation of transcription, DNA-templated                     | GO:0045892 | 0.01575461       | 1.80                               | 1375      | 8                 | 0.006 | MECOM,ZFP608,BTG2,VGLL4,EHMT1,TLE4,TRPS1,JUN                             |
| negative regulation of nucleic acid-templated transcription             | GO:1903507 | 0.01592334       | 1.80                               | 1377      | 8                 | 0.006 | MECOM,ZFP608,BTG2,VGLL4,EHMT1,TLE4,TRPS1,JUN                             |
| negative regulation of RNA biosynthetic process                         | GO:1902679 | 0.01600828       | 1.80                               | 1378      | 8                 | 0.006 | MECOM,ZFP608,BTG2,VGLL4,EHMT1,TLE4,TRPS1,JUN                             |
| regulation of cell population proliferation                             | GO:0042127 | 0.00099769       | 3.00                               | 1764      | 10                | 0.006 | MECOM,PBX1,BTG2,VGLL4,CLDN5,JUN,NRAA1,STAT3,FOSL2,TPM1                   |
| negative regulation of nucleobase-containing compound metabolic process | GO:0045934 | 0.00528324       | 2.28                               | 1620      | 9                 | 0.006 | MECOM,ZFP608,BTG2,VGLL4,EHMT1,TLE4,TRPS1,JUN,STAT3                       |
| negative regulation of cellular biosynthetic process                    | GO:0031327 | 0.00702294       | 2.15                               | 1677      | 9                 | 0.005 | MECOM,ZFP608,BTG2,VGLL4,EHMT1,TLE4,TRPS1,JUN,STAT3                       |
| negative regulation of biosynthetic process                             | GO:0009890 | 0.00864453       | 2.06                               | 1720      | 9                 | 0.005 | MECOM,ZFP608,BTG2,VGLL4,EHMT1,TLE4,TRPS1,JUN,STAT3                       |
| regulation of transcription by RNA polymerase II                        | GO:0006357 | 2.1315E-05       | 4.67                               | 2494      | 13                | 0.005 | NFIA,MECOM,ZFP608,PBX1,BTG2,EHMT1,TLE4,TRPS1,JUN,NRAA1,STAT3,LITAF,FOSL2 |
| transcription by RNA polymerase II                                      | GO:0006366 | 2.9241E-05       | 4.53                               | 2560      | 13                | 0.005 | NFIA,MECOM,ZFP608,PBX1,BTG2,EHMT1,TLE4,TRPS1,JUN,NRAA1,STAT3,LITAF,FOSL2 |
| response to oxygen-containing compound                                  | GO:1901700 | 0.00336244       | 2.47                               | 2014      | 10                | 0.005 | MIBD5,BTG2,CLDN5,AKAP12,JUN,NRAA1,STAT3,LITAF,FOSL2,TPM1                 |
| positive regulation of RNA metabolic process                            | GO:0051254 | 0.01472863       | 1.83                               | 1836      | 9                 | 0.005 | NFIA,MECOM,PBX1,BTG2,JUN,NRAA1,STAT3,LITAF,FOSL2                         |
| cell population proliferation                                           | GO:0008283 | 0.00510999       | 2.29                               | 2109      | 10                | 0.005 | MECOM,PBX1,BTG2,VGLL4,CLDN5,JUN,NRAA1,STAT3,FOSL2,TPM1                   |
| positive regulation of macromolecule biosynthetic process               | GO:0010557 | 0.0203829        | 1.69                               | 1911      | 9                 | 0.005 | NFIA,MECOM,PBX1,AKAP12,JUN,NRAA1,STAT3,LITAF,FOSL2                       |
| tissue development                                                      | GO:0009888 | 0.03533652       | 1.45                               | 2046      | 9                 | 0.004 | MECOM,PBX1,BTG2,VGLL4,CLDN5,JUN,NRAA1,FOSL2,TPM1                         |
| positive regulation of nucleobase-containing compound metabolic process | GO:0045935 | 0.03575443       | 1.45                               | 2049      | 9                 | 0.004 | NFIA,MECOM,PBX1,BTG2,JUN,NRAA1,STAT3,LITAF,FOSL2                         |
| positive regulation of biosynthetic process                             | GO:0009891 | 0.04032752       | 1.39                               | 2080      | 9                 | 0.004 | NFIA,MECOM,PBX1,AKAP12,JUN,NRAA1,STAT3,LITAF,FOSL2                       |

### Endothelial cell pathways downregulated with PF treatment

| term name                                                | term id    | adjusted p value | negative log10 of adjusted p value | term size | intersection size | ratio | intersections                                         |
|----------------------------------------------------------|------------|------------------|------------------------------------|-----------|-------------------|-------|-------------------------------------------------------|
| regulation of muscle filament sliding speed              | GO:0032972 | 0.00598089       | 2.223234                           | 2         | 2                 | 1.000 | TNNT2,TNNC1                                           |
| phosphocreatine metabolic process                        | GO:0006603 | 0.03580199       | 1.446093                           | 4         | 2                 | 0.500 | CKMT2,CKM                                             |
| phosphagen metabolic process                             | GO:0006599 | 0.03580199       | 1.446093                           | 4         | 2                 | 0.500 | CKMT2,CKM                                             |
| regulation of muscle filament sliding                    | GO:0032971 | 0.03580199       | 1.446093                           | 4         | 2                 | 0.500 | TNNT2,TNNC1                                           |
| phosphagen biosynthetic process                          | GO:0042396 | 0.03580199       | 1.446093                           | 4         | 2                 | 0.500 | CKMT2,CKM                                             |
| phosphocreatine biosynthetic process                     | GO:0046314 | 0.03580199       | 1.446093                           | 4         | 2                 | 0.500 | CKMT2,CKM                                             |
| actin-myosin filament sliding                            | GO:0033275 | 0.0017024        | 2.768938                           | 11        | 3                 | 0.273 | ACTC1,TNNT2,TNNC1                                     |
| mitochondrial electron transport, cytochrome c to oxygen | GO:0006123 | 7.6459E-07       | 6.116572                           | 22        | 5                 | 0.227 | COX411,COX6A2,COX6C,COX7A1,COX7C                      |
| proton motive force-driven ATP synthesis                 | GO:0015986 | 0.02053825       | 1.687437                           | 24        | 3                 | 0.125 | ATP5L,ATP5B,ATP5G1                                    |
| ventricular cardiac muscle tissue morphogenesis          | GO:0055010 | 7.9874E-05       | 4.097596                           | 53        | 5                 | 0.094 | TNNI3,MYL3,TNNT2,MYL2,TNNC1                           |
| aerobic electron transport chain                         | GO:0019646 | 3.3623E-06       | 5.473362                           | 64        | 6                 | 0.094 | COX411,COX6A2,COX6C,UQCRC1,COX7A1,COX7C               |
| cardiac muscle tissue morphogenesis                      | GO:0055008 | 5.3393E-06       | 5.272513                           | 68        | 6                 | 0.087 | TNNI3,ACTC1,MYL3,TNNT2,MYL2,TNNC1                     |
| ventricular cardiac muscle tissue development            | GO:0003229 | 0.00019299       | 3.714462                           | 63        | 5                 | 0.079 | TNNI3,MYL3,TNNT2,MYL2,TNNC1                           |
| mitochondrial ATP synthesis coupled electron transport   | GO:0042775 | 1.0445E-05       | 4.981093                           | 77        | 6                 | 0.078 | COX411,COX6A2,COX6C,UQCRC1,COX7A1,COX7C               |
| ATP synthesis coupled electron transport                 | GO:0042773 | 1.2212E-05       | 4.913218                           | 79        | 6                 | 0.076 | COX411,COX6A2,COX6C,UQCRC1,COX7A1,COX7C               |
| muscle tissue morphogenesis                              | GO:0060415 | 1.5321E-05       | 4.814721                           | 82        | 6                 | 0.073 | TNNI3,ACTC1,MYL3,TNNT2,MYL2,TNNC1                     |
| muscle organ morphogenesis                               | GO:0048644 | 2.6944E-05       | 4.569534                           | 90        | 6                 | 0.067 | TNNI3,ACTC1,MYL3,TNNT2,MYL2,TNNC1                     |
| respiratory electron transport chain                     | GO:0022904 | 1.8842E-06       | 5.724877                           | 108       | 7                 | 0.065 | COX411,COX6A2,COX6C,UQCRC1,COX7A1,NDUFAS,COX7C        |
| oxidative phosphorylation                                | GO:0006119 | 1.1394E-07       | 6.943311                           | 124       | 8                 | 0.065 | COX411,COX6A2,ATP5B,CHCHD10,COX6C,UQCRC1,COX7A1,COX7C |
| cardiac ventricle morphogenesis                          | GO:0003208 | 0.00056793       | 3.245708                           | 78        | 5                 | 0.064 | TNNI3,MYL3,TNNT2,MYL2,TNNC1                           |

## Supplemental Table 5

### cardiac cell pathways upregulated with sema treatment

| term name                                                    | term id    | adjusted p value | negative log10 of adjusted p value | term size | intersection size | ratio | intersections                                                                                                          |
|--------------------------------------------------------------|------------|------------------|------------------------------------|-----------|-------------------|-------|------------------------------------------------------------------------------------------------------------------------|
| actin-myosin filament sliding                                | GO:0033275 | 0,00850262       | 2,07                               | 11        | 3                 | 0,273 | ACTC1,TPM1,MYL6                                                                                                        |
| regulation of amyloid fibril formation                       | GO:1905906 | 0,018629         | 1,73                               | 14        | 3                 | 0,214 | APOE,CRYAB,CLU                                                                                                         |
| mitochondrial electron transport, NADH to ubiquinone         | GO:0006120 | 0,00309329       | 2,51                               | 28        | 4                 | 0,143 | MT-ND6,NDUFV2,NDUFV1,NDUFS3                                                                                            |
| tricarboxylic acid cycle                                     | GO:0006099 | 0,00538059       | 2,27                               | 32        | 4                 | 0,125 | MDH2,SUCLG1,SDHB,IDH2                                                                                                  |
| response to electrical stimulus                              | GO:0051602 | 0,03043094       | 1,52                               | 49        | 4                 | 0,082 | ACTB,SOD2,NR4A1,BTG2                                                                                                   |
| chaperone-mediated protein folding                           | GO:0061077 | 0,0037061        | 2,43                               | 66        | 5                 | 0,076 | HSPA8,HSPB1,HSPA5,CLU,FKBP5                                                                                            |
| response to cadmium ion                                      | GO:0046686 | 0,04828244       | 1,32                               | 55        | 4                 | 0,073 | GSN,HSPA8,SOD2,MT1                                                                                                     |
| regulation of striated muscle contraction                    | GO:0006942 | 0,01717365       | 1,77                               | 90        | 5                 | 0,056 | CCN2,MYL3,NR4A1,CALM1,TNNI3                                                                                            |
| negative regulation of intrinsic apoptotic signaling pathway | GO:2001243 | 0,02733272       | 1,56                               | 99        | 5                 | 0,051 | HSPB1,SOD2,CLU,VDAC2,NDUFS3                                                                                            |
| protein folding                                              | GO:0006457 | 0,00010843       | 3,96                               | 168       | 8                 | 0,048 | CRYAB,HSPA8,HSPB1,NPPB,HSPA5,HSP90A1,CLU,FKBP5                                                                         |
| negative regulation of protein-containing complex assembly   | GO:0031333 | 0,01660861       | 1,78                               | 154       | 6                 | 0,039 | GSN,CRYAB,TPM1,HSPA5,CLU,VDAC2                                                                                         |
| muscle contraction                                           | GO:0006936 | 6,948E-06        | 5,16                               | 310       | 11                | 0,035 | GSN,ACTC1,TPM1,MYL6,CSR3,MYL2,CCN2,MYL3,NR4A1,CALM1,TNNI3                                                              |
| negative regulation of supramolecular fiber organization     | GO:1902904 | 0,03217248       | 1,49                               | 173       | 6                 | 0,035 | GSN,APOE,CRYAB,HSPA8,TPM1,CLU                                                                                          |
| regulation of blood circulation                              | GO:1903522 | 0,03427462       | 1,47                               | 262       | 7                 | 0,027 | TPM1,CSR3,MYL2,CCN2,MYL3,CALM1,TNNI3                                                                                   |
| regulation of protein stability                              | GO:0031647 | 0,01046017       | 1,98                               | 308       | 8                 | 0,026 | GSN,CRYAB,HSPA8,CD81,SERF2,LAMP1,HSP90A1,CLU                                                                           |
| response to metal ion                                        | GO:0010038 | 0,00518292       | 2,29                               | 376       | 9                 | 0,024 | GSN,FABP4,HSPA8,SOD2,HSPA5,MT1,BSG,CALM1,JUND                                                                          |
| response to inorganic substance                              | GO:0010035 | 0,00023454       | 3,63                               | 653       | 13                | 0,020 | GSN,FABP4,MT-ND6,CRYAB,HSPA8,SOD2,HSPA5,MT1,BSG,NR4A1,CALM1,JUND,PRDX1                                                 |
| negative regulation of programmed cell death                 | GO:0043069 | 1,3417E-07       | 6,87                               | 1053      | 20                | 0,019 | APOE,MECOM,CRYAB,HSPA8,ACTC1,CAMK1D,SLC25A4,HSPB1,SOD2,HSPA5,HSP90A1,MT1,DUSP1,NR4A1,HIGD1A,CLU,BTG2,YBX1,VDAC2,NDUFS3 |
| mitochondrion organization                                   | GO:0007005 | 0,01378171       | 1,86                               | 540       | 10                | 0,019 | DCN,CFH,MT-ND6,SLC25A4,SOD2,NDUFAB1,COX7A2L,HIGD1A,VDAC2,NDUFS3                                                        |

### cardiac cell pathways upregulated with PF treatment

| term name                                                                                | term id    | adjusted p value | negative log10 of adjusted p value | term size | intersection size | ratio | intersections                                       |
|------------------------------------------------------------------------------------------|------------|------------------|------------------------------------|-----------|-------------------|-------|-----------------------------------------------------|
| negative regulation of mitochondrial membrane permeability involved in apoptotic process | GO:1902109 | 0,02894086       | 1,54                               | 4         | 2                 | 0,500 | ACAA2,SLC25A4                                       |
| mitochondrial electron transport, cytochrome c to oxygen                                 | GO:0006123 | 1,82E-09         | 8,74                               | 22        | 6                 | 0,273 | MT-CO1,COX7C,COX6C,COX7A2,COX5A,COX4I1              |
| cardiac myofibril assembly                                                               | GO:0055003 | 0,00843747       | 2,07                               | 20        | 3                 | 0,150 | CSR3,ACTC1,MYL2                                     |
| regulation of the force of heart contraction                                             | GO:0002026 | 0,02676745       | 1,57                               | 29        | 3                 | 0,103 | CSR3,MYL3,MYL2                                      |
| ventricular cardiac muscle tissue development                                            | GO:0003229 | 0,00639031       | 2,19                               | 63        | 4                 | 0,063 | TNNI3,MYL3,TPM1,MYL2                                |
| myofibril assembly                                                                       | GO:0030239 | 0,00770434       | 2,11                               | 66        | 4                 | 0,061 | CSR3,ACTC1,TPM1,MYL2                                |
| striated muscle cell development                                                         | GO:0055002 | 0,00818376       | 2,09                               | 67        | 4                 | 0,060 | CSR3,ACTC1,TPM1,MYL2                                |
| cardiac ventricle morphogenesis                                                          | GO:0003208 | 0,01503195       | 1,82                               | 78        | 4                 | 0,051 | TNNI3,MYL3,TPM1,MYL2                                |
| cardiac muscle cell development                                                          | GO:0055013 | 0,03426574       | 1,47                               | 96        | 4                 | 0,042 | CSR3,SLC25A4,ACTC1,MYL2                             |
| nucleoside triphosphate metabolic process                                                | GO:0009141 | 0,00320935       | 2,49                               | 123       | 5                 | 0,041 | MT-ATP8,ATP5C1,ATP5L,ATP5B,ATP5G3                   |
| cardiac cell development                                                                 | GO:0055006 | 0,0435223        | 1,36                               | 102       | 4                 | 0,039 | CSR3,SLC25A4,ACTC1,MYL2                             |
| response to reactive oxygen species                                                      | GO:0000302 | 0,00246841       | 2,61                               | 215       | 6                 | 0,028 | PRDX1,SOD2,HSPA8,MB,TPM1,CRYAB                      |
| muscle cell development                                                                  | GO:0055001 | 0,04047652       | 1,39                               | 207       | 5                 | 0,024 | CSR3,SLC25A4,ACTC1,TPM1,MYL2                        |
| ribonucleotide metabolic process                                                         | GO:0009259 | 0,00037994       | 3,42                               | 390       | 8                 | 0,021 | SUCLG1,MT-ATP8,ATP5C1,ATP5L,MPC2,ACAA2,ATP5B,ATP5G3 |
| purine nucleotide metabolic process                                                      | GO:0006163 | 0,00043493       | 3,36                               | 397       | 8                 | 0,020 | SUCLG1,MT-ATP8,ATP5C1,ATP5L,MPC2,ACAA2,ATP5B,ATP5G3 |
| ribose phosphate metabolic process                                                       | GO:0019693 | 0,00046052       | 3,34                               | 400       | 8                 | 0,020 | SUCLG1,MT-ATP8,ATP5C1,ATP5L,MPC2,ACAA2,ATP5B,ATP5G3 |
| purine-containing compound metabolic process                                             | GO:0072521 | 0,00067855       | 3,17                               | 421       | 8                 | 0,019 | SUCLG1,MT-ATP8,ATP5C1,ATP5L,MPC2,ACAA2,ATP5B,ATP5G3 |
| response to oxidative stress                                                             | GO:0006979 | 0,00094684       | 3,02                               | 440       | 8                 | 0,018 | MT-CO1,PRDX1,SOD2,HSPA8,MB,HSPB1,TPM1,CRYAB         |
| organophosphate biosynthetic process                                                     | GO:0090407 | 0,00303157       | 2,52                               | 514       | 8                 | 0,016 | MT-ATP8,ATP5C1,ATP5L,MPC2,ATP5B,ATP5G3,CKM,FABP3    |
